# Supplementary material for: Molecular Population Genetics of the Northern Elephant Seal Mirounga angustirostris
Source: Oxford University Press journal article supplement (doi:10.1093/jhered/esx053), 2017-06-22
Supplement: esx053_suppl_supplement-table1.pdf [file esx053_suppl_supplement-table1.pdf]

Supplemental Table 1. Monomorphic microsatellite loci and the species in which they were originally identified. All loci are dinucleotides, except BG ( $\beta$ -globin) which is pentanucleotide.

| Locus  | Species in which locus was identified | Reference                    |
|--------|---------------------------------------|------------------------------|
| Aa4    | <i>Arctocephalus australis</i>        | Gemmell <i>et al.</i> (1997) |
| BG     | <i>Mirounga angustirostris</i>        | " "                          |
| HG1.3  | <i>Halichoerus grypus</i>             | " "                          |
| HG3.7  | <i>Halichoerus grypus</i>             | " "                          |
| HG6.3  | <i>Halichoerus grypus</i>             | Allen <i>et al.</i> (1995)   |
| HGD.2  | <i>Halichoerus grypus</i>             | " "                          |
| Hi-14  | <i>Hydrurga leptonynx</i>             | Davis <i>et al.</i> (2002)   |
| Hi-15  | <i>Hydrurga leptonynx</i>             | " "                          |
| Hi-16  | <i>Hydrurga leptonynx</i>             | " "                          |
| Hi-2   | <i>Hydrurga leptonynx</i>             | " "                          |
| Hi-20  | <i>Hydrurga leptonynx</i>             | " "                          |
| Hi-4   | <i>Hydrurga leptonynx</i>             | " "                          |
| Lc-13  | <i>Lobodon carcinophagus</i>          | " "                          |
| Lc-26  | <i>Lobodon carcinophagus</i>          | " "                          |
| Lc-28  | <i>Lobodon carcinophagus</i>          | " "                          |
| Lc-5   | <i>Lobodon carcinophagus</i>          | " "                          |
| Lc-6   | <i>Lobodon carcinophagus</i>          | " "                          |
| Lw-11  | <i>Leptonychotes weddellii</i>        | " "                          |
| Lw-15  | <i>Leptonychotes weddellii</i>        | " "                          |
| Lw-4   | <i>Leptonychotes weddellii</i>        | " "                          |
| Lw-5   | <i>Leptonychotes weddellii</i>        | " "                          |
| Lw-7   | <i>Leptonychotes weddellii</i>        | " "                          |
| Lw-9   | <i>Leptonychotes weddellii</i>        | " "                          |
| MACA1  | <i>Mirounga angustirostris</i>        | Garza (1998)                 |
| MACA2  | <i>Mirounga angustirostris</i>        | " "                          |
| CORT   | <i>Mirounga leonina</i>               | Pastor <i>et al.</i> (2004)  |
| PV2    | <i>Phoca vitulina</i>                 | Goodman (1997)               |
| PV10   | <i>Phoca vitulina</i>                 | " "                          |
| PV11   | <i>Phoca vitulina</i>                 | " "                          |
| PV16   | <i>Phoca vitulina</i>                 | " "                          |
| PVC19  | <i>Phoca vitulina</i>                 | Coltman <i>et al.</i> (1996) |
| PVC29  | <i>Phoca vitulina</i>                 | " "                          |
| PVC30  | <i>Phoca vitulina</i>                 | " "                          |
| PVC63  | <i>Phoca vitulina</i>                 | " "                          |
| PVC78  | <i>Phoca vitulina</i>                 | " "                          |
| SGPv3  | <i>Phoca vitulina</i>                 | Goodman (1997)               |
| SGPv10 | <i>Phoca vitulina</i>                 | " "                          |
| SGPv11 | <i>Phoca vitulina</i>                 | " "                          |
