# Supplementary material for: Molecular Population Genetics of the Northern Elephant Seal Mirounga angustirostris
Source: Oxford University Press journal article supplement (doi:10.1093/jhered/esx053), 2017-06-22
Supplement: esx053_suppl_supplement-table2.pdf [file esx053_suppl_supplement-table2.pdf]

Supplemental Table 2. Allele frequencies for all polymorphic loci by population. Population codes are as in Figure 2.

| Locus/<br>allele size | Populations |       |       |       |       |       |
|-----------------------|-------------|-------|-------|-------|-------|-------|
|                       | SBC         | GI    | SNI   | SMI   | PB    | MMC   |
| Hi-8                  |             |       |       |       |       |       |
| 97                    | 36.11       | 33.83 | 33.10 | 36.14 | 36.84 | 36.03 |
| 99                    | 14.35       | 22.46 | 22.54 | 20.79 | 17.37 | 20.45 |
| 101                   | 49.54       | 43.71 | 44.37 | 43.07 | 45.79 | 43.52 |
| Lw-20                 |             |       |       |       |       |       |
| 123                   | 29.36       | 27.47 | 31.01 | 35.20 | 31.05 | 31.38 |
| 131                   | 40.83       | 37.65 | 43.04 | 38.27 | 37.37 | 38.70 |
| 133                   | 0.46        | 0.93  | 0.63  | 0.51  | 1.05  | 0.42  |
| 135                   | 29.36       | 33.95 | 25.32 | 26.02 | 30.53 | 29.50 |
| Lw-18                 |             |       |       |       |       |       |
| 103                   | 46.82       | 44.19 | 37.50 | 40.80 | 44.74 | 40.87 |
| 105                   | 0.45        | 0.97  |       |       |       | 0.62  |
| 107                   | 52.73       | 54.84 | 60.63 | 59.20 | 55.26 | 58.51 |
| 109                   |             |       | 1.88  |       |       |       |
| Lw-16                 |             |       |       |       |       |       |
| 162                   | 63.96       | 64.55 | 61.69 | 65.10 | 68.42 | 67.15 |
| 164                   | 36.04       | 35.45 | 38.31 | 34.90 | 31.58 | 32.85 |
| Lw-10                 |             |       |       |       |       |       |
| 118                   | 54.72       | 53.80 | 44.93 | 44.51 | 55.26 | 51.27 |
| 120                   | 0.47        |       |       |       | 1.05  | 0.21  |
| 122                   | 44.81       | 46.20 | 55.07 | 55.49 | 43.68 | 48.31 |
| 124                   |             |       |       |       |       | 0.21  |
| Lw-8                  |             |       |       |       |       |       |
| 106                   | 1.85        | 3.68  | 1.52  | 1.50  | 2.20  | 2.10  |
| 108                   | 98.15       | 96.32 | 98.48 | 98.50 | 97.80 | 97.90 |
| HG3.6                 |             |       |       |       |       |       |
| 87                    | 10.09       | 8.88  | 8.23  | 9.09  | 11.46 | 10.82 |
| 89                    | 89.91       | 91.12 | 91.77 | 90.91 | 88.54 | 89.18 |

|        |        |       |        |        |        |        |
|--------|--------|-------|--------|--------|--------|--------|
| HG4.2  | SBC    | GI    | SNI    | SMI    | PB     | MMC    |
| 137    | 54.50  | 52.69 | 50.65  | 61.06  | 52.66  | 55.02  |
| 145    | 45.50  | 47.31 | 49.35  | 38.94  | 47.34  | 44.98  |
| HG8.10 | SBC    | GI    | SNI    | SMI    | PB     | MMC    |
| 181    | 81.08  | 81.29 | 82.35  | 78.00  | 83.68  | 83.91  |
| 183    | 18.92  | 18.71 | 17.65  | 22.00  | 16.32  | 16.09  |
| HG8.9  | SBC    | GI    | SNI    | SMI    | PB     | MMC    |
| 180    | 57.66  | 53.64 | 60.96  | 60.68  | 54.21  | 57.88  |
| 182    | 4.95   | 8.18  | 5.48   | 2.43   | 7.37   | 5.00   |
| 186    | 37.39  | 38.18 | 33.56  | 36.89  | 38.42  | 37.12  |
| MA11A  | SBC    | GI    | SNI    | SMI    | PB     | MMC    |
| 145    | 76.82  | 81.99 | 82.47  | 77.45  | 84.44  | 81.58  |
| 151    | 23.18  | 18.01 | 17.53  | 22.55  | 15.56  | 18.42  |
| PVC1   | SBC    | GI    | SNI    | SMI    | PB     | MMC    |
| 97     |        |       |        |        |        | 0.19   |
| 101    | 28.64  | 30.61 | 22.67  | 25.00  | 27.47  | 25.67  |
| 103    | 32.73  | 29.39 | 28.67  | 37.50  | 34.62  | 36.21  |
| 105    | 38.18  | 40.00 | 48.67  | 37.50  | 37.91  | 37.93  |
| 107    | 0.45   |       |        |        |        |        |
| HG2.3  | SBC    | GI    | SNI    | SMI    | PB     | MMC    |
| 119    | 27.10  | 17.17 | 17.72  | 17.93  | 22.40  | 19.85  |
| 121    | 27.10  | 31.33 | 35.44  | 24.46  | 20.83  | 26.72  |
| 125    | 45.79  | 51.51 | 46.84  | 57.61  | 56.25  | 53.44  |
| 127    |        |       |        |        | 0.52   |        |
| MA11C  | SBC    | GI    | SNI    | SMI    | PB     | MMC    |
| 185    | 1.83   | 1.52  | 0.63   | 1.90   | 2.11   | 0.77   |
| 187    | 98.17  | 98.48 | 99.37  | 98.10  | 96.84  | 99.23  |
| 189    |        |       |        |        | 1.05   |        |
| PV17   | SBC    | GI    | SNI    | SMI    | PB     | MMC    |
| 132    |        | 0.31  |        |        |        |        |
| 136    | 100.00 | 99.69 | 100.00 | 100.00 | 100.00 | 100.00 |

|       |       |       |       |       |       |       |
|-------|-------|-------|-------|-------|-------|-------|
| PV9   | SBC   | GI    | SNI   | SMI   | PB    | MMC   |
| 159   | 70.27 | 68.34 | 73.65 | 74.02 | 71.58 | 62.79 |
| 161   | 29.73 | 31.66 | 26.35 | 25.98 | 28.42 | 37.21 |
| PVC26 | SBC   | GI    | SNI   | SMI   | PB    | MMC   |
| 108   | 81.02 | 84.42 | 87.18 | 81.00 | 78.85 | 79.28 |
| 110   | 18.98 | 15.58 | 12.82 | 19.00 | 21.15 | 20.72 |
| PVC43 | SBC   | GI    | SNI   | SMI   | PB    | MMC   |
| 108   | 18.75 | 17.84 | 15.82 | 17.14 | 15.43 | 15.09 |
| 110   | 4.91  | 6.14  | 3.80  | 5.71  | 9.57  | 8.11  |
| 112   | 68.30 | 71.35 | 77.85 | 72.38 | 70.21 | 71.70 |
| 114   | 8.04  | 4.68  | 2.53  | 4.76  | 4.79  | 5.09  |
| PVC74 | SBC   | GI    | SNI   | SMI   | PB    | MMC   |
| 209   | 36.50 | 37.50 | 35.42 | 44.77 | 46.11 | 36.46 |
| 211   |       |       |       |       | 0.56  |       |
| 213   | 1.00  |       |       |       |       |       |
| 215   | 25.50 | 25.78 | 34.72 | 23.26 | 20.00 | 22.38 |
| 219   |       |       |       | 0.58  |       |       |
| 221   | 37.00 | 36.72 | 29.17 | 31.40 | 33.33 | 41.16 |
| 223   |       |       | 0.69  |       |       |       |
| Orr1  | SBC   | GI    | SNI   | SMI   | PB    | MMC   |
| 193   | 0.45  |       |       |       |       |       |
| 197   | 17.86 | 14.23 | 22.50 | 16.00 | 12.09 | 17.08 |
| 199   | 25.45 | 23.17 | 23.13 | 17.00 | 29.67 | 24.26 |
| 201   | 55.80 | 62.60 | 53.75 | 67.00 | 58.24 | 58.17 |
| 203   | 0.45  |       | 0.63  |       |       | 0.50  |
| Orr10 | SBC   | GI    | SNI   | SMI   | PB    | MMC   |
| 169   | 13.39 | 14.15 | 8.75  | 4.33  | 6.25  | 12.05 |
| 173   |       |       |       |       |       | 0.22  |
| 175   | 86.61 | 85.85 | 91.25 | 95.67 | 93.75 | 87.72 |

---
